# Supplementary material for: Tetraspanin 8 (TSPAN 8) as a potential target for radio-immunotherapy of colorectal cancer
Source: PubMed Central journal article supplement (PMC5400644; doi:10.18632/oncotarget.15787), 2017-02-28
Supplement: oncotarget-08-22034-s001.pdf [file oncotarget-08-22034-s001.pdf]

# Tetraspanin 8 (TSPAN 8) as a potential target for radio-immunotherapy of colorectal cancer

## SUPPLEMENTARY FIGURES AND TABLES

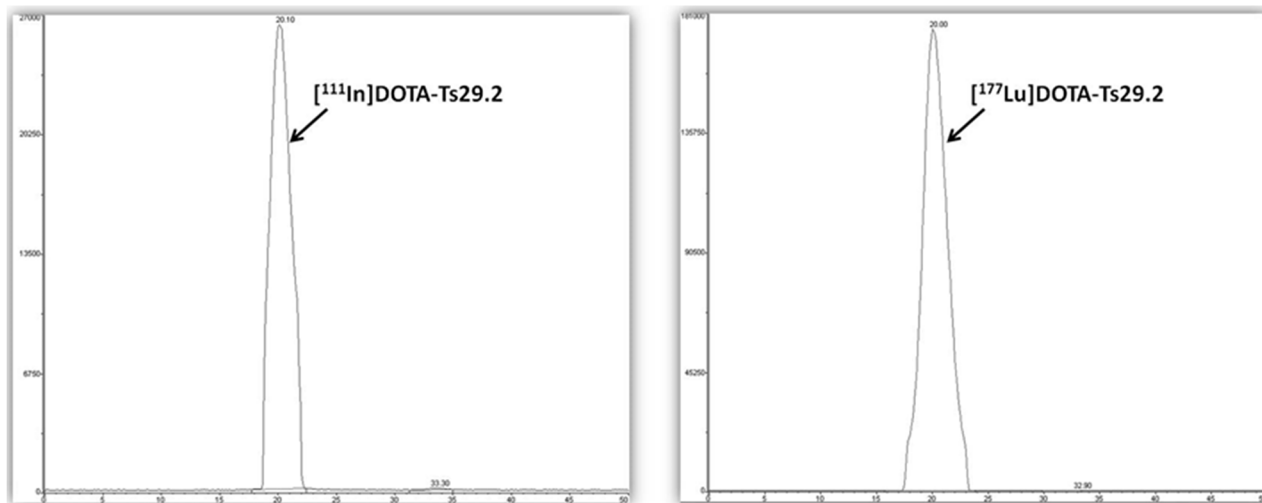

Analytic size exclusion HPLC analyses performed on a Superose 12 column, 10/300 GL, 11  $\mu\text{m}$  (GE Healthcare), isocratic elution (20 mM 4-(2-hydroxyethyl)-1-piperazineethanesulfonic acid HEPES, 150 mM NaCl, pH = 7.3, flow rate: 0.5 mL.min<sup>-1</sup>)

Supplementary Figure 1: HPLC analyses of radiolabeled of  $[^{111}\text{In}]\text{DOTA-Ts29.2}$  (left) and  $[^{177}\text{Lu}]\text{DOTA-Ts29.2}$  (right).

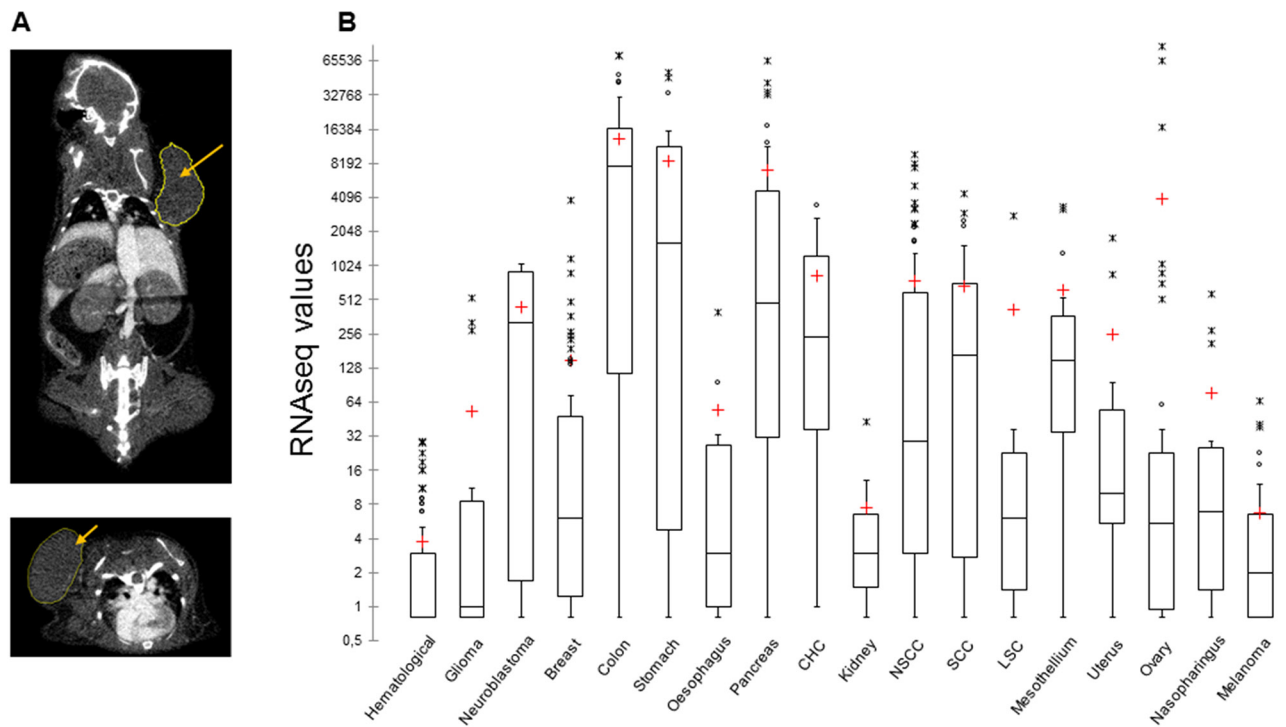

**Supplementary Figure 2:** **A.** CT images (left: sagittal, right: axial) of mice used for volume organs determination involved in S factors calculation. The arrows indicate the tumors. **B.** mRNA quantification of TSPAN8 in different cell lines according to the tissue type. These data were extracted from the study of Klijn C. *et al.* [35]. Red crosses represent the mean, box plots encompass the median value (central line), and crosses that do not enter in the boxes can be considered as extreme values.

Supplementary Tables 1 and 2: Dosimetry calculations performed by computing S factors with the GATE Monte Carlo platform and biodistribution data

| <sup>177</sup> Lu S-factors |                     | targets         |                 |                 |                 |                 |                 |                 |                 |
|-----------------------------|---------------------|-----------------|-----------------|-----------------|-----------------|-----------------|-----------------|-----------------|-----------------|
| Gy/Bq/s                     |                     | rest of body    | tumor           | spleen          | kidneys         | liver           | heart           | lungs           | brain           |
| <b>sources</b>              | <i>rest of body</i> | <b>6.06E-13</b> | 3.13E-14        | 8.62E-14        | 3.85E-14        | 5.00E-14        | 4.91E-14        | 5.80E-14        | 3.82E-14        |
|                             | <i>tumor</i>        | 3.65E-14        | <b>3.21E-11</b> | 1.54E-17        | 1.88E-17        | 6.06E-17        | 5.16E-17        | 2.02E-16        | 1.97E-17        |
|                             | <i>spleen</i>       | 1.01E-13        | 1.52E-17        | <b>1.62E-10</b> | 6.18E-14        | 2.65E-15        | 2.67E-17        | 4.64E-17        | 5.21E-18        |
|                             | <i>kidneys</i>      | 4.52E-14        | 1.80E-17        | 6.72E-14        | <b>3.95E-11</b> | 3.23E-14        | 1.89E-17        | 2.96E-17        | 3.45E-18        |
|                             | <i>liver</i>        | 5.80E-14        | 5.94E-17        | 2.61E-15        | 3.41E-14        | <b>1.47E-11</b> | 5.18E-15        | 8.45E-14        | 7.17E-18        |
|                             | <i>heart</i>        | 4.89E-14        | 5.95E-17        | 2.47E-17        | 1.70E-17        | 1.22E-14        | <b>4.66E-11</b> | 3.80E-12        | 1.79E-17        |
|                             | <i>lungs</i>        | 6.74E-14        | 2.04E-16        | 4.64E-17        | 2.91E-17        | 8.44E-14        | 9.84E-13        | <b>3.78E-11</b> | 1.85E-17        |
|                             | <i>brain</i>        | 4.43E-14        | 1.97E-17        | 5.09E-18        | 3.30E-18        | 7.89E-18        | 2.19E-17        | 1.89E-17        | <b>5.21E-11</b> |

  

| <sup>90</sup> Y S-factors |                     | targets         |                 |                 |                 |                 |                 |                 |                 |
|---------------------------|---------------------|-----------------|-----------------|-----------------|-----------------|-----------------|-----------------|-----------------|-----------------|
| Gy/Bq/s                   |                     | rest of body    | tumor           | spleen          | kidneys         | liver           | heart           | lungs           | brain           |
| <b>sources</b>            | <i>rest of body</i> | <b>4.71E-12</b> | 5.37E-13        | 2.91E-12        | 2.41E-12        | 2.18E-12        | 1.80E-12        | 2.40E-12        | 1.75E-12        |
|                           | <i>tumor</i>        | 1.42E-12        | <b>8.51E-11</b> | 5.24E-16        | 1.61E-14        | 3.48E-12        | 2.04E-15        | 2.39E-12        | 2.81E-16        |
|                           | <i>spleen</i>       | 3.35E-12        | 2.11E-16        | <b>5.50E-11</b> | 3.88E-11        | 3.00E-13        | 3.56E-16        | 5.17E-16        | 8.57E-17        |
|                           | <i>kidneys</i>      | 3.85E-12        | 2.68E-16        | 7.92E-13        | <b>7.52E-11</b> | 1.14E-13        | 2.80E-16        | 3.86E-16        | 7.35E-17        |
|                           | <i>liver</i>        | 3.01E-12        | 4.52E-15        | 1.91E-12        | 2.36E-11        | <b>2.64E-11</b> | 7.45E-14        | 2.07E-13        | 1.26E-16        |
|                           | <i>heart</i>        | 1.41E-12        | 1.34E-15        | 9.11E-16        | 6.16E-16        | 3.51E-11        | <b>1.15E-10</b> | 1.63E-11        | 2.77E-16        |
|                           | <i>lungs</i>        | 1.89E-12        | 2.69E-13        | 1.79E-12        | 1.08E-10        | 4.10E-11        | 1.22E-11        | <b>4.17E-11</b> | 2.54E-16        |
|                           | <i>brain</i>        | 3.82E-12        | 1.80E-15        | 1.76E-16        | 1.32E-16        | 2.92E-16        | 1.29E-15        | 9.44E-16        | <b>1.01E-10</b> |

Dose values (Gy) were calculated for a 3.7 MBq injection of the radiolabeled antibody Ts29.2. Ratios of doses between tumor and other organs were evaluated
